# Supplementary material for: Fungicidal, Corrosive, and Mutational Effects of Polyhexamethylene Biguanide Combined with 1-Bromo-3-chloro-5,5-dimethylimidazolidine-2,4-dione
Source: Hindawi journal article supplement (doi:10.1155/2017/4357031), 2017-01-01
Supplement: f1 [file 4357031.f1.pdf]

**Table 1 Composition of stainless**

| 304         | C      | Mn     | P       | S       | Si     | Cr        | Ni       | N      |
|-------------|--------|--------|---------|---------|--------|-----------|----------|--------|
| Content (%) | ≤ 0.07 | ≤ 2.00 | ≤ 0.045 | ≤ 0.030 | ≤ 0.75 | 17.5-19.5 | 8.0-10.5 | ≤ 0.10 |
